# Supplementary material
Source: PubMed Central journal article supplement (PMC6025975)
Supplement: jci-128-97736-s359.pdf [file jci-128-97736-s359.pdf]

# Supplemental Figures

## Figure S1

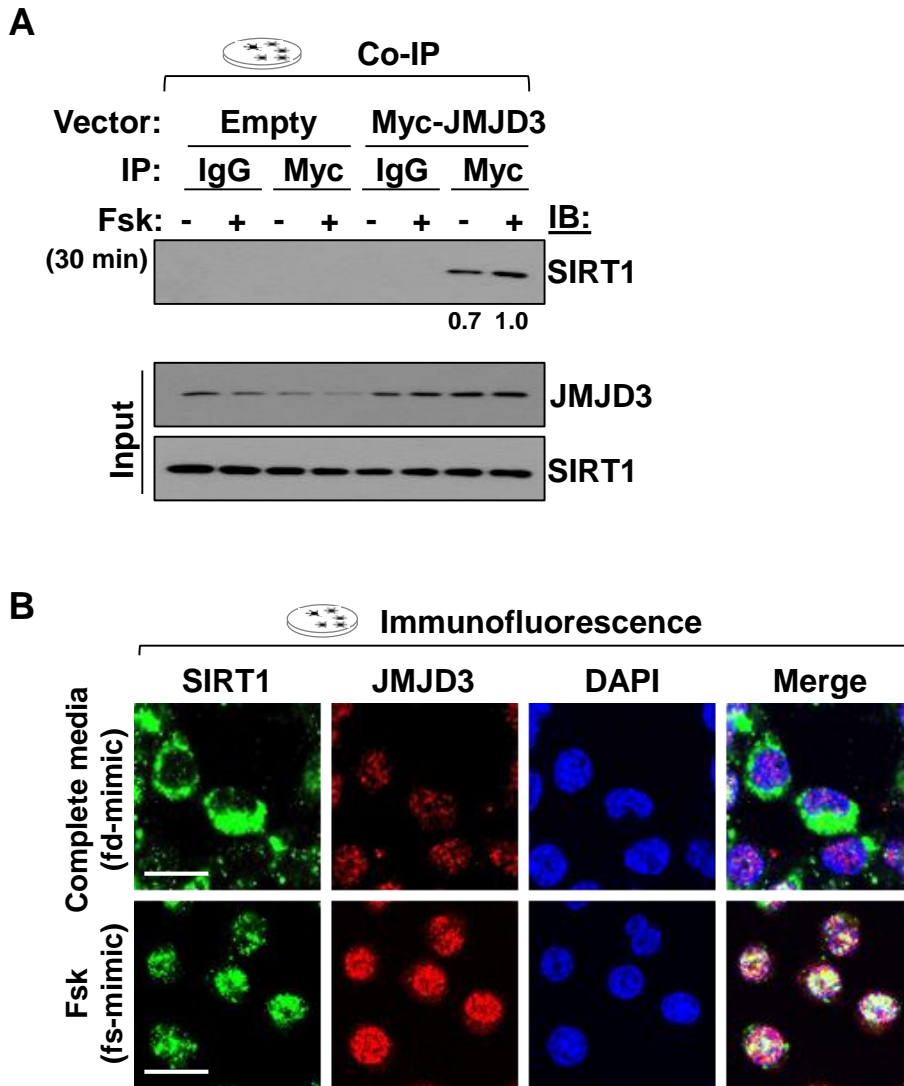

**Figure S1. JMJD3 is a potential SIRT1-interacting protein in Fsk-treated hepatic cells. (A) CoIP of SIRT1 and exogenously expressed Myc-JMJD3.** Hepa1c1c7 cells were transfected with Myc-JMJD3 or empty vector for 24 h, and treated with vehicle or Fsk (10  $\mu$ M) for 30 min. SIRT1 in IgG (control) or anti-Myc (Myc-JMJD3) immunoprecipitates was detected by IB. JMJD3 and SIRT1 in the input were detected by IB using SIRT1 or JMJD3 (not Myc) antibody. **(B) Fsk treatment results in increased nuclear localization of both JMJD3 and SIRT1 in hepatic cells.** Hepa1c1c7 cells were treated with vehicle or Fsk for 6 h and JMJD3 and SIRT1 was detected by immunofluorescence. The white bar indicates 20  $\mu$ m.

## Figure S2

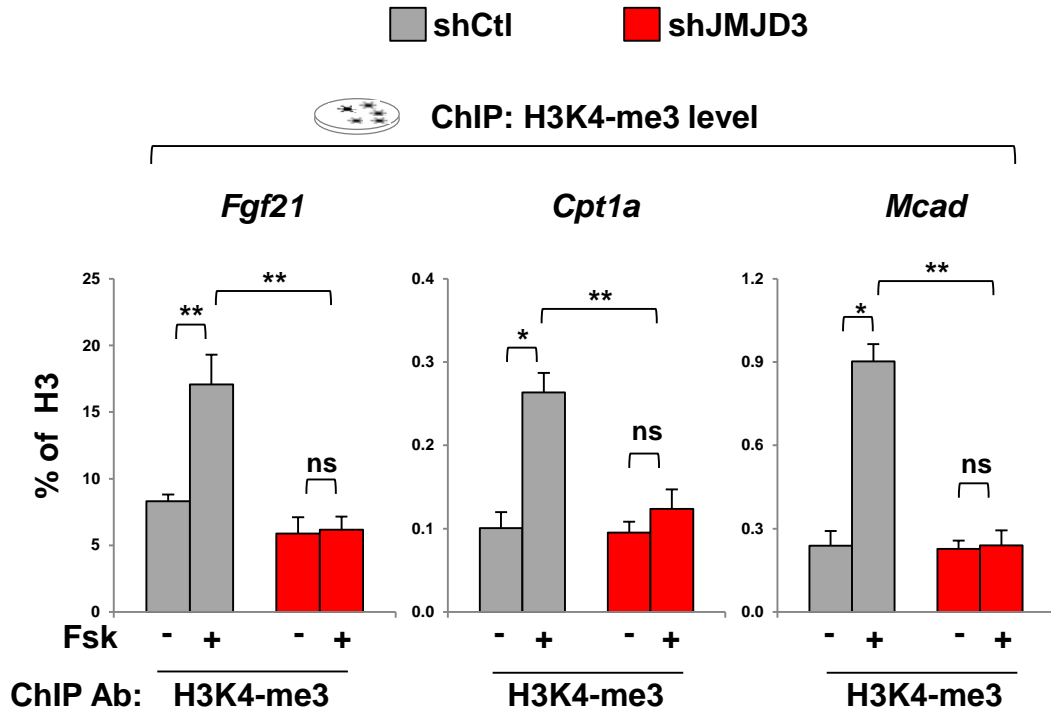

**Figure S2. Effects of JMJD3 downregulation on histone H3K4-me3 levels at  $\beta$ -oxidation genes.** Hepatocytes were infected with lenti-shRNA for JMJD3 (shJMJD3) or control RNA (shCtl), and 60 h later, cells were treated with 10  $\mu$ M Fsk for 3 h. Levels of histone H3 and H3K4-me3 were determined by ChIP assay at the indicated genes. The ratio of H3K4-me3 to total H3 is plotted. Statistical significance was determined by two-way ANOVA with the FDR test (SEM,  $n=3$ , \* $P<0.05$ , \*\* $P<0.01$ , ns, statistically not significant).

## Figure S3

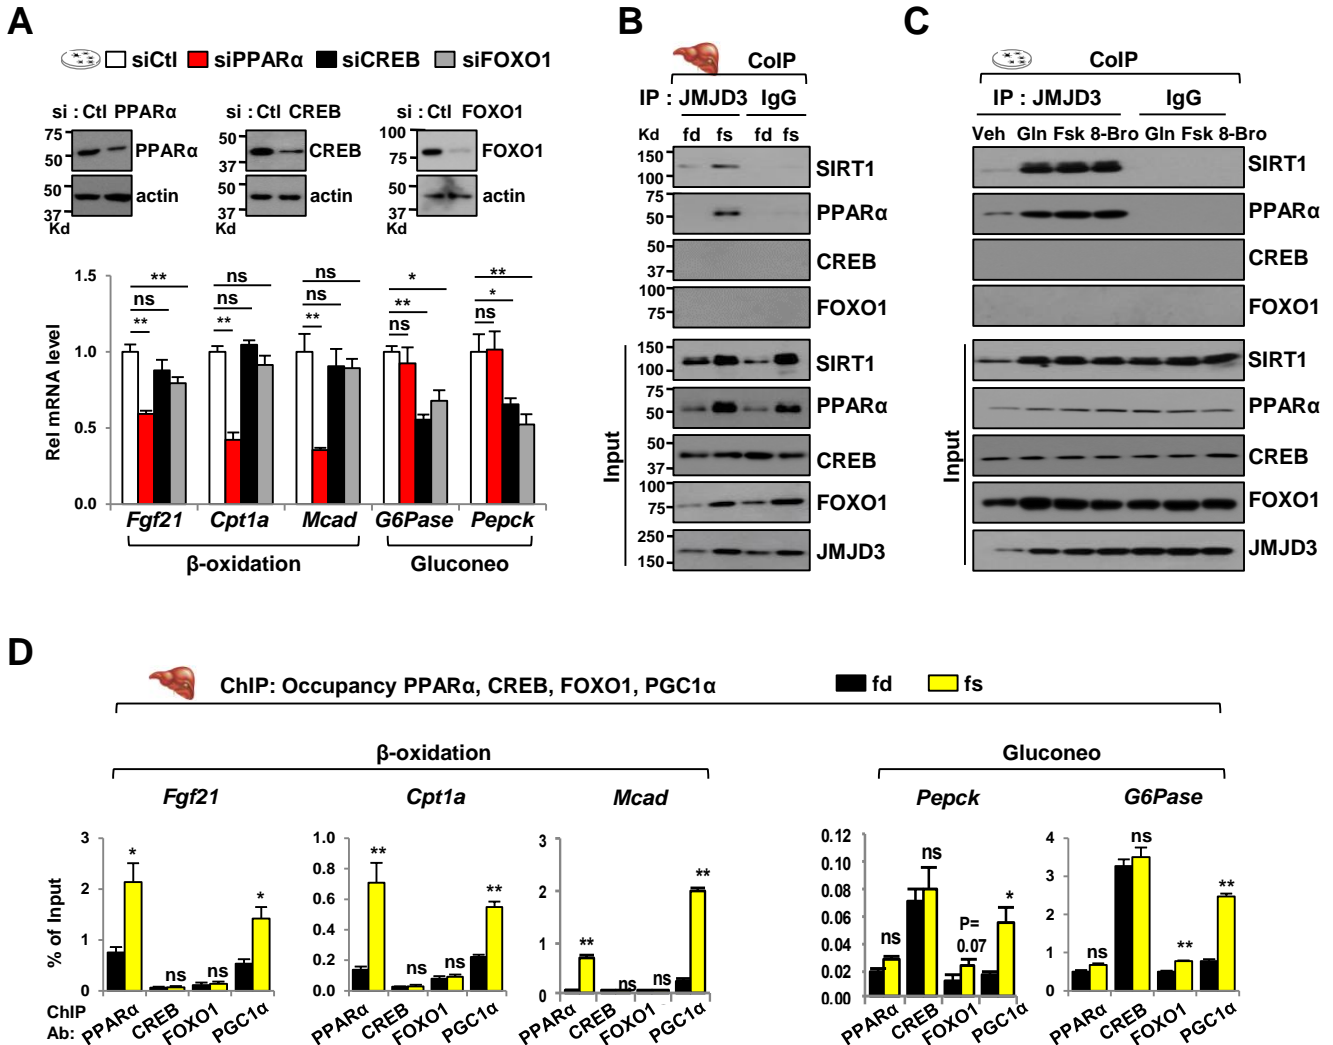

**Figure S3. SIRT1 and PPAR $\alpha$  are important for JMJD3 recruitment to  $\beta$ -oxidation genes.** (A) Effects of downregulation of PPAR $\alpha$ , CREB, and FOXO1 on mRNA levels of  $\beta$ -oxidation and gluconeogenic genes: Hepatocytes were transfected with siRNA for the indicated genes for 48 h and were treated with 10  $\mu$ M Fsk for 6 h. Protein levels were determined by IB (top) and mRNA levels were determined by q-RT-PCR (bottom) (n=8). (B) CoIP: Effects of fasting on JMJD3 interaction with SIRT1, PPAR $\alpha$ , CREB, and FOXO1: Mice were fasted for 16 h (representative blot of 3 independent experiments) or (C) CoIP: Hepatocytes were treated with 10 nM glucagon (Gln), 10  $\mu$ M forskolin (Fsk), or 0.1 mM 8-bromo-cAMP (8-Bro) for 3 h. CoIP assays were done using whole cell extracts. (D) ChIP: Effects of fasting on occupancy of PPAR $\alpha$ , CREB, FOXO1, and PGC-1 $\alpha$  at *Fgf21*, *Cpt1a*, *Mcad*, *Pepck* and *G6Pase* genes: Mice (n=3) were fasted (fs) for 16 h or fed (fd) for 6 h after fasting and ChIP assays using whole liver extracts were done with antibodies for the indicated proteins. (A, D) Statistical significance was determined by (A) one-way ANOVA with the FDR test or (D) the Mann-Whitney test (SEM, \*P<0.05, \*\*P<0.01, ns, statistically not significant).

**Figure S4**

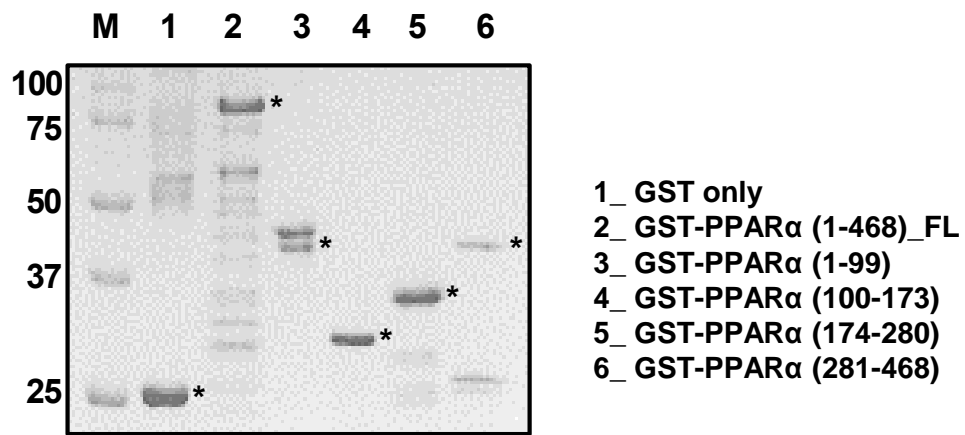

**Figure S4. GST-PPAR $\alpha$  fusion proteins:** SDS-PAGE analysis of GST-PPAR $\alpha$  fusion proteins that were used in GST pull down experiments (Fig. 3B).

**Figure S5**

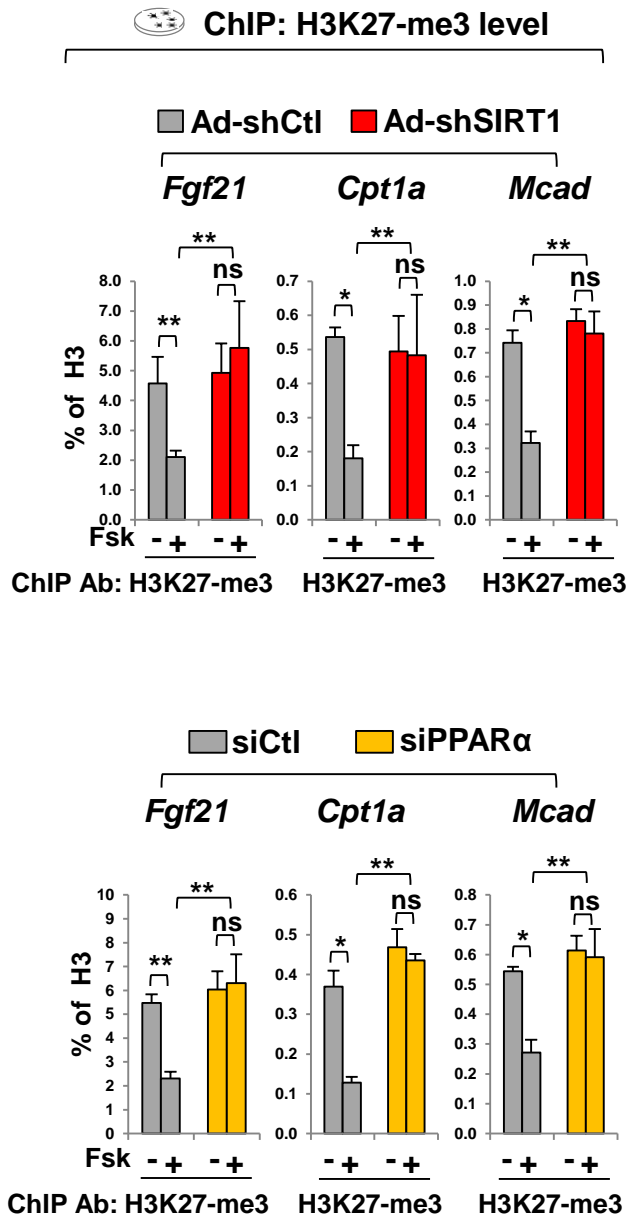

**Figure S5. Fsk-mediated decreases in histone H3K27-me3 levels at  $\beta$ -oxidation genes are blunted by downregulation of either SIRT1 or PPAR $\alpha$ .** Hepatocytes were infected with Ad-shSIRT1 or Ad-shCtl for 48 h (left), or transfected with PPAR $\alpha$  siRNA (siPPAR $\alpha$ ) or control RNA (siCtl) for 48 h (right), and treated with 10  $\mu$ M Fsk for 3 h. The ratios of H3K27-me3 levels to total histone H3 levels determined by ChIP assay are shown. Statistical significance was determined by two-way ANOVA with the FDR test (SEM, n=3, \*P<0.05, \*\*P<0.01, ns, statistically not significant).

## Figure S6

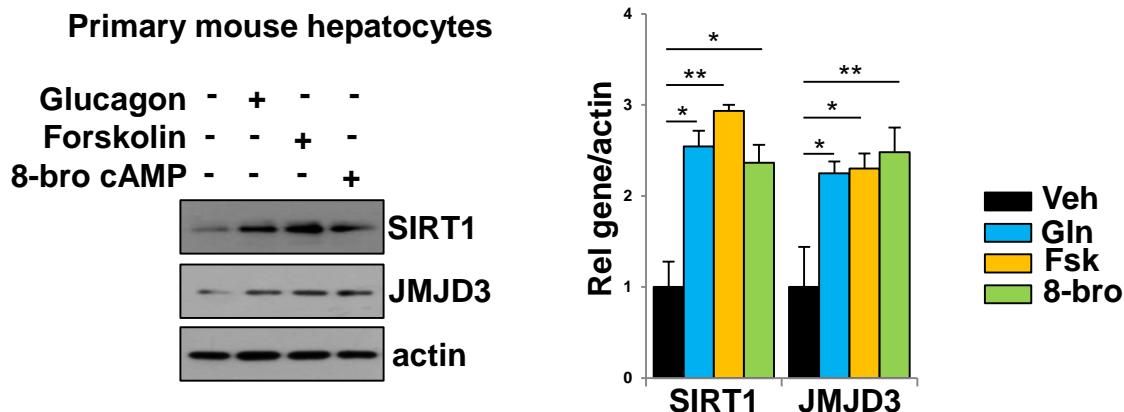

**Figure S6. Treatment with glucagon, Fsk, or 8-bromo cAMP leads to increased protein levels of SIRT1 and JMJD3. (A)** Hepatocytes were treated with 10 nM glucagon (Gln), 10  $\mu$ M forskolin (Fsk), or 0.1 mM 8-bromo-cAMP (8-Bro) for 6 h and protein levels of the indicated proteins were determined by IB (left) and band intensities (n=3) were quantified (right). Statistical significance was determined by one-way ANOVA with the FDR test (SEM, \*P<0.05, \*\*P<0.01, ns, statistically not significant).

**Figure S7**

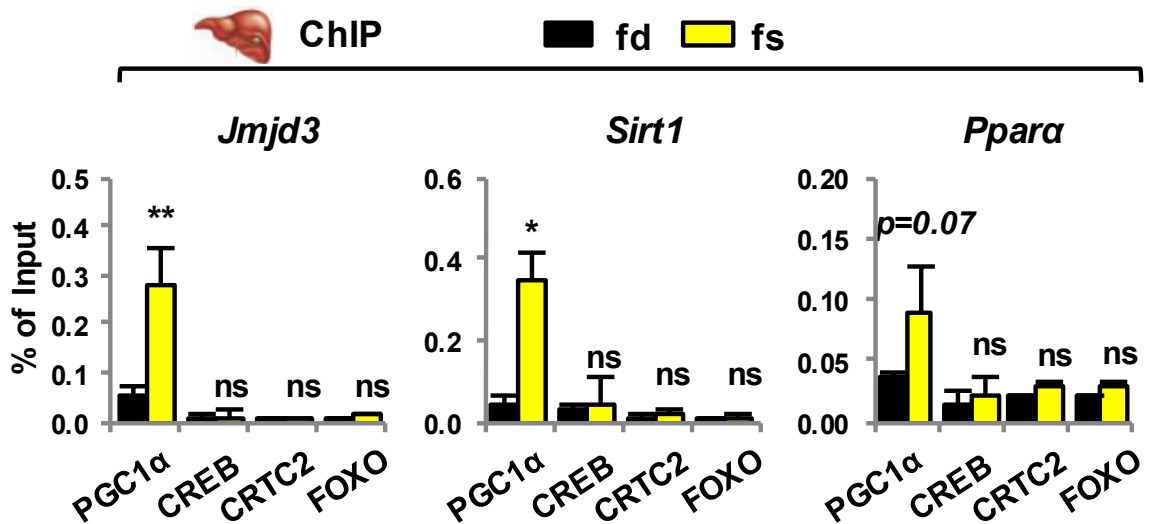

**Figure S7. Effects of fasting on occupancy of PGC-1 $\alpha$ , CREB, CRTC2, FOXO1 at *Jmjd3*, *Sirt1*, and *Ppara*.** Mice (n=3) were fasted (fs) for 16 h or fed (fd) for 6 h after fasting. Occupancy of the indicated proteins at hepatic *Jmjd3*, *Sirt1*, and *Ppara* genes was determined by ChIP. Statistical significance was determined by the Mann-Whitney test (SEM, n=3 mice/group, \*P<0.05, \*\*P<0.01, ns, statistically not significant).

Figure S8

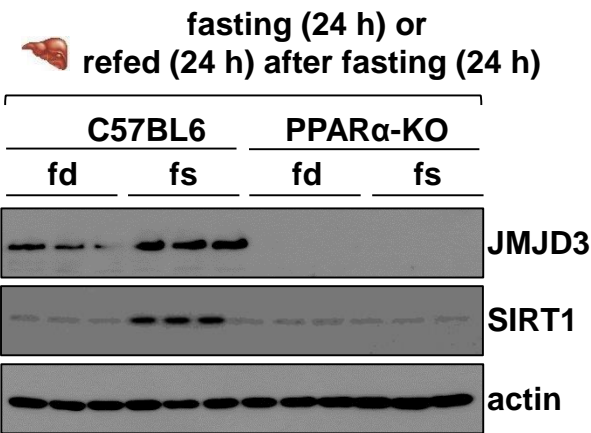

**Figure S8. Fasting-induced increases in protein levels of JMJD3 and SIRT1 is blunted in PPAR $\alpha$ -KO mice.** C57BL6 mice and PPAR $\alpha$ -KO mice were fasted for 24 h or refed for 24 h after fasting and protein levels of JMJD3 and SIRT1 in liver extracts were determined by IB.

**Figure S9**

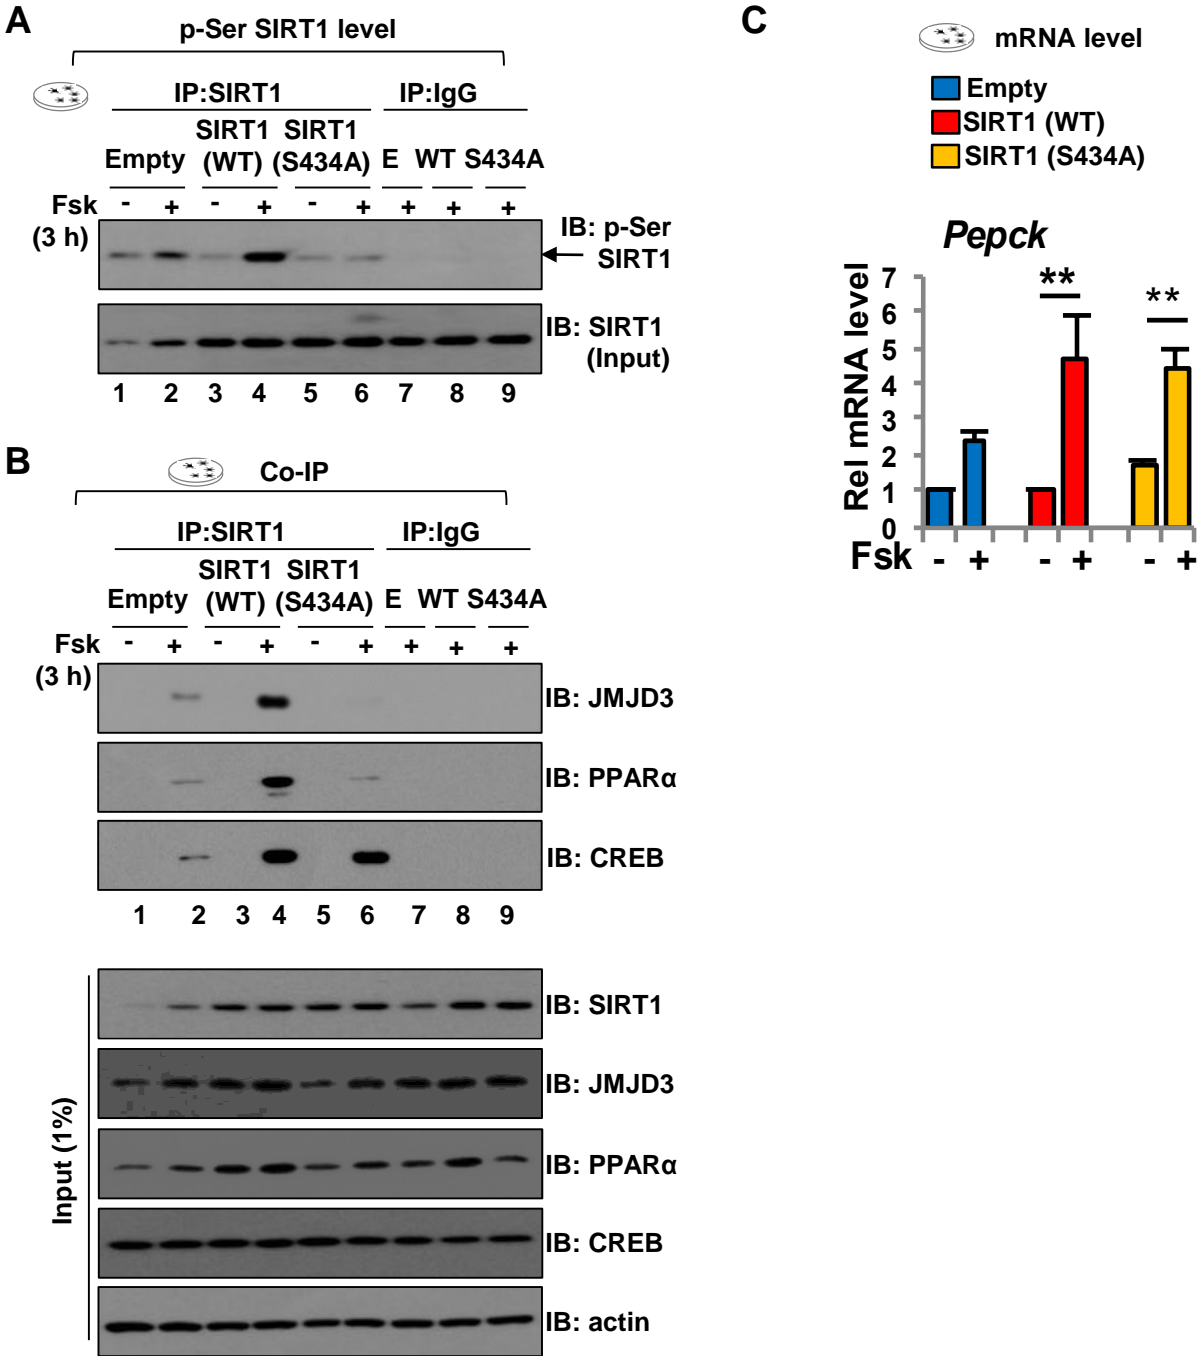

**Figure S9. PKA-induced S434-SIRT1 phosphorylation is important for its functional interaction with JMJD3 and PPAR $\alpha$ .** Hepatocytes were transfected with expression vectors for SIRT1-WT or S434A-SIRT1 or control empty vector for 24 h, and treated with 10  $\mu$ M Fsk for 3h (**A**, **B**) or 6 h (**C**). (**A**) The p-Ser SIRT1 levels determined by IP/IB. (**B**) JMJD3, PPAR $\alpha$ , and CREB in anti-SIRT1 immunoprecipitates from whole cells detected by IB (top) Input levels of the indicated proteins determined by IB. (**A**, **B**) Consistent results were observed in 2 independent assays. (**C**) The mRNA levels of *Pepck*. Statistical significance was determined by two-way ANOVA with the FDR test (SEM, n=6, \*\*P<0.01).

**Figure S10**

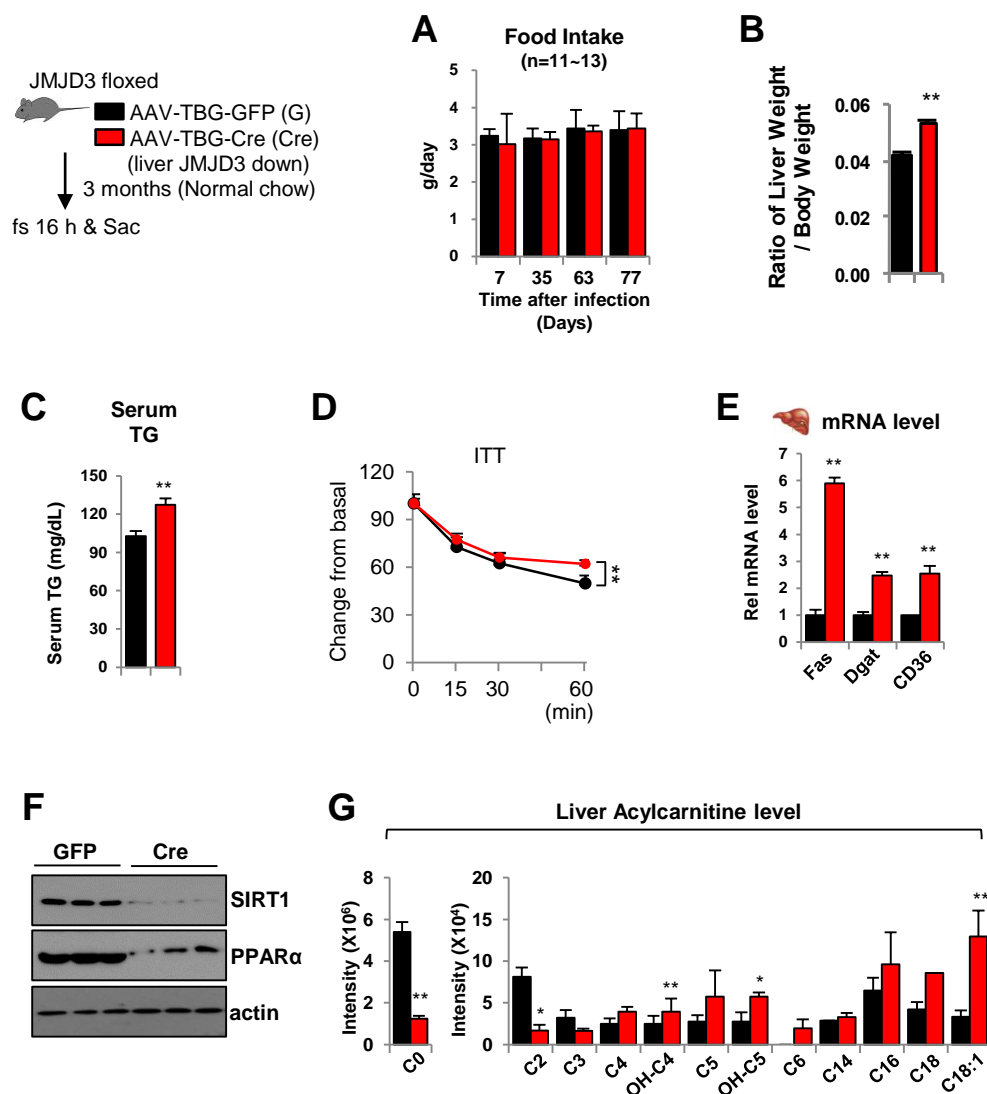

**Figure S10. Downregulation of hepatic JMJD3 in mice.** JMJD3 floxed mice were injected with AAV-TBG-Cre or AAV-TBG-GFP (control) for 3 months. **(A)** Food intake. **(B)** Ratio of liver weight to body weight. **(C)** Serum TG levels. **(D)** Insulin tolerance test (ITT). **(E)** Hepatic mRNA levels the indicated genes. **(F)** SIRT1 and PPAR $\alpha$  protein levels determined by IB. **(G)** Levels of liver acylcarnitines. **(B-E, G)** Statistical significance was determined by the Student's t-test (SEM, n=6~8 mice/group, \*p<0.05, \*\*p<0.01, ns, statistically not significant).

**Figure S11**

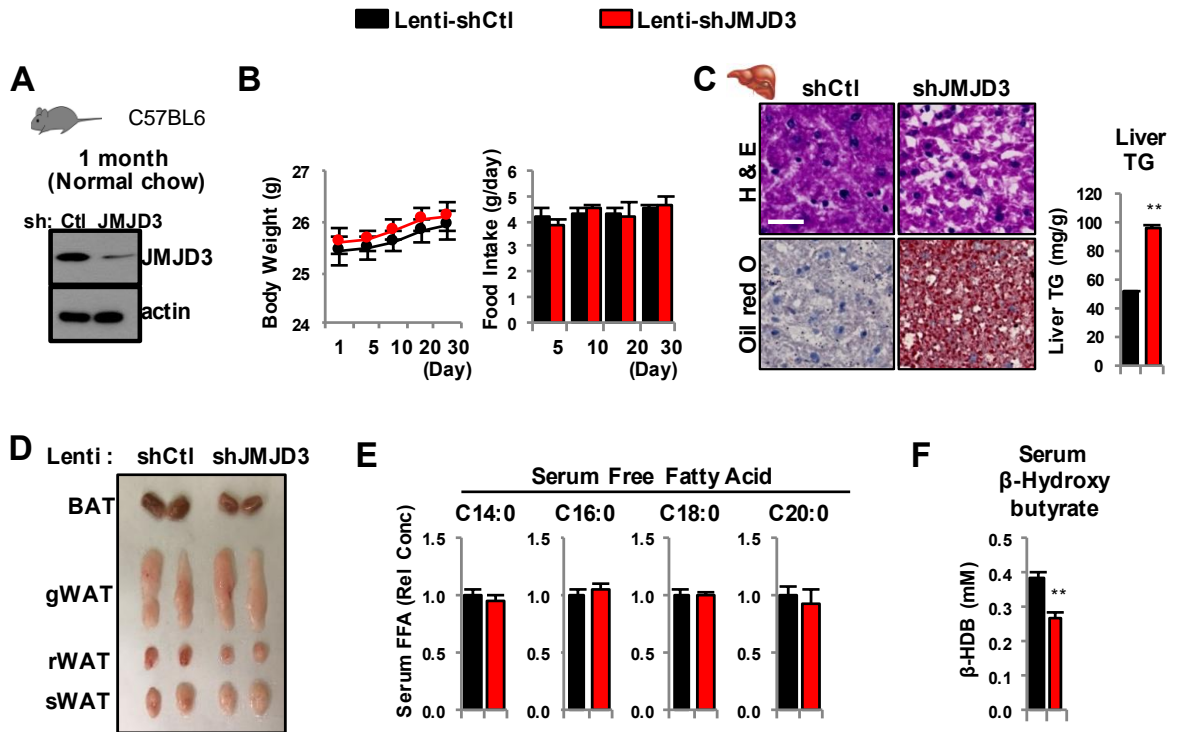

**Figure S11. Downregulation of JMJD3 leads to liver steatosis without increasing body weight and adiposity. (A-F)** C57BL6 mice were infected with lenti-shRNA for JMJD3 or control lenti-shCtl for 1 month. **(A)** JMJD3 protein levels determined by IB. **(B)** Body weight and food intake. **(C)** Liver sections stained with H&E and Oil Red O (left) and hepatic TG levels (right). The white bar indicates 100  $\mu$ m. **(D)** Images of adipose tissues. **(E)** Levels of serum FFA levels and **(F)** serum  $\beta$ -hydroxybutyrate measured by GC/MS. **(C, F)** Statistical significance was determined by the Student's t-test (SEM, n=5~6 mice/group, \*p<0.05, \*\*p<0.01, ns, statistically not significant).

## Figure S12

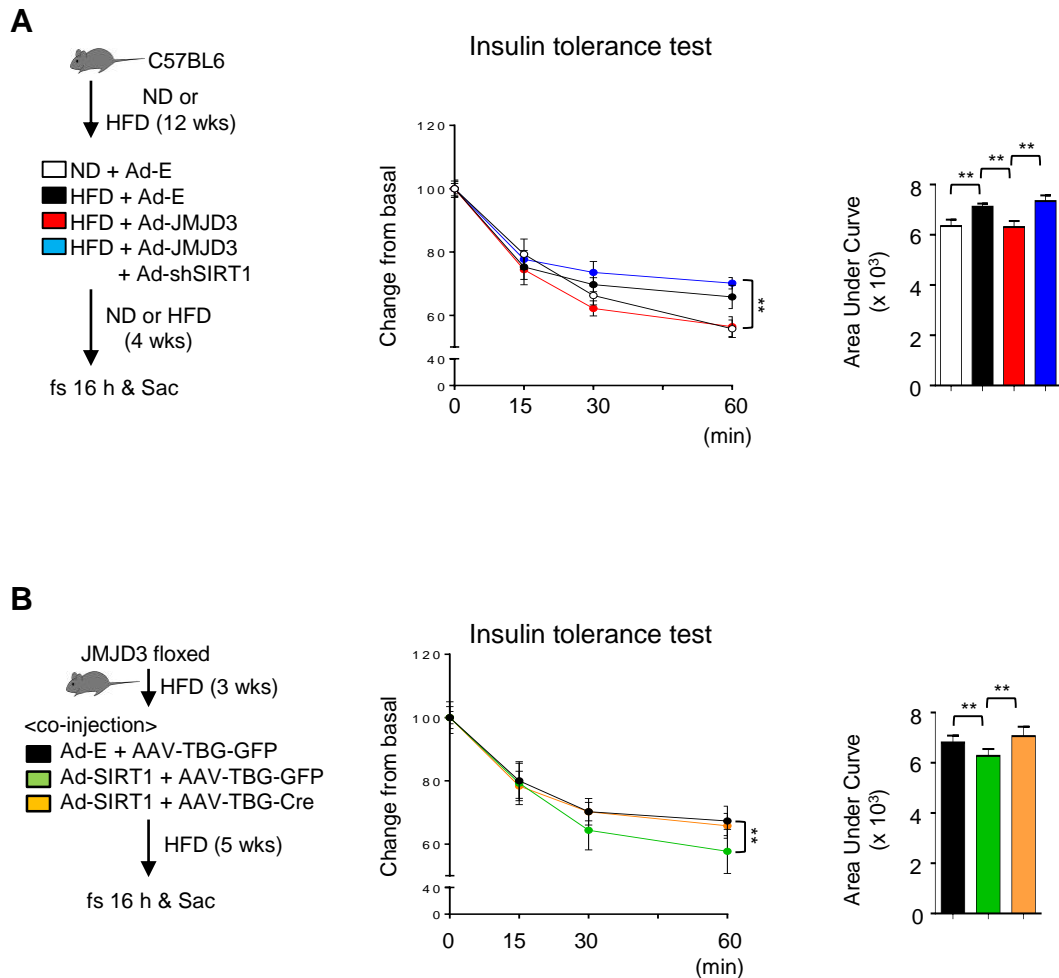

**Figure S12. Improved insulin tolerance mediated by overexpression of JMJD3 or SIRT1 in diet-induced obese mice is mutually interdependent.** **(A)** Mice were fed a HFD for 12 weeks or ND and injected with the indicated viruses for 4 weeks, and an insulin tolerance test (ITT) was performed. Experimental outline (left), relative changes in serum glucose levels (middle), and the area under curves (right). **(B)** Mice were fed a HFD for 3 weeks, infected with the indicated viruses for 5 weeks and fasted for 4 h and an ITT was done. Experimental outline (left), relative changes in serum glucose levels (middle), and the area under curves (right). Statistical significance was determined by one-way ANOVA with the FDR test (SEM, \* $P < 0.05$ , \*\* $P < 0.01$ ).

## Figure S13

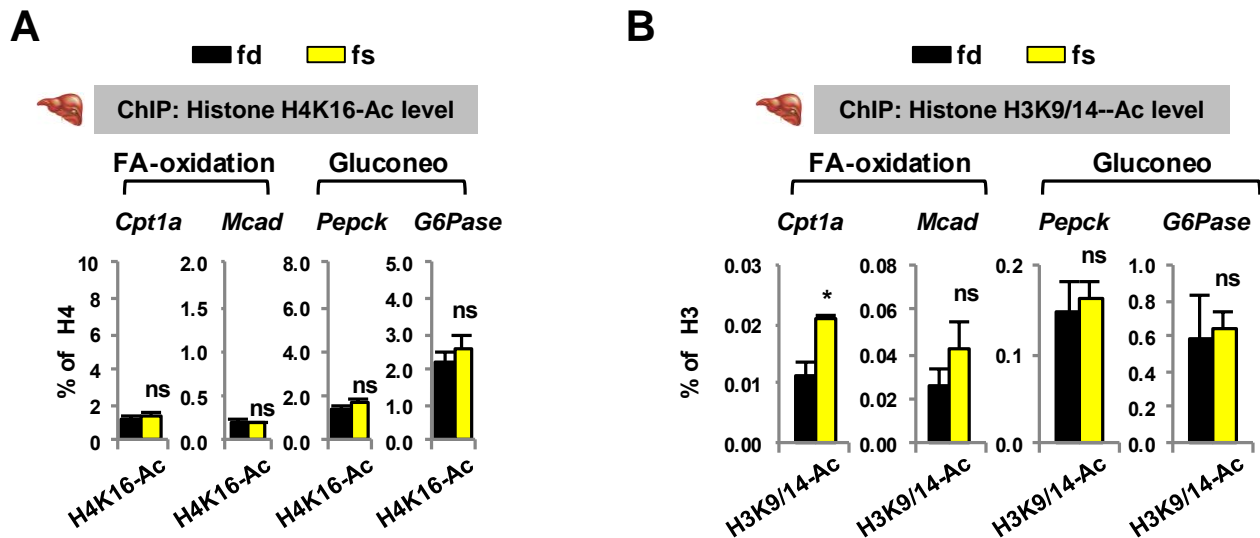

**Figure S13. Effects of fasting or feeding on histone H4K16-Ac and H3K9/14-Ac levels at  $\beta$ -oxidation and gluconeogenic genes.** Mice were fasted (fs) for 16 h or fed (fd) for 6 h after fasting, and histone H4 and H3 and histone H4K16-Ac levels and H3K9/14-Ac levels at the indicated genes were determined by liver ChIP assays. The ratios of acetylated H4K16-Ac to histone H4 (**A**) and acetylated H3K9/14-Ac to histone H3 (**B**) at the indicated genes are shown. Statistical significance was determined by the Mann-Whitney test (SEM, n=3 mice/group, \*P<0.05, \*\*P<0.01, ns, statistically not significant).

## Supplemental Tables

**Table S1. Biological processes potentially regulated by gene ontology analysis using DAVIS. (RNA-seq from lenti-shJMJD3 vs microarray from PPAR $\alpha$ -KO)**

| GO_ID      | Gene Ontology Term               | Gene # | p-value  |
|------------|----------------------------------|--------|----------|
| GO:0055114 | mitochondrion                    | 118    | 3.75E-40 |
| GO:0006629 | oxidation-reduction process      | 59     | 3.60E-24 |
| GO:0008152 | lipid metabolic process          | 45     | 2.72E-20 |
| GO:0006635 | metabolic process                | 45     | 3.81E-20 |
| GO:0006631 | fatty acid beta-oxidation        | 17     | 1.49E-17 |
| GO:0055088 | fatty acid metabolic process     | 23     | 4.78E-14 |
| GO:0033539 | lipid homeostasis                | 10     | 3.07E-08 |
| GO:0006637 | long-chain fatty acid metabolism | 6      | 1.16E-05 |
| GO:0019433 | acyl-CoA metabolic process       | 7      | 1.43E-05 |
| GO:0032000 | triglyceride catabolic process   | 5      | 3.64E-04 |
| GO:0006810 | carnitine metabolic process      | 4      | 4.18E-04 |
| GO:0019915 | triglyceride metabolic process   | 5      | 4.75E-03 |
| GO:0001889 | lipid catabolic process          | 7      | 1.26E-02 |

**Table S2. Biological processes potentially regulated by gene ontology analysis using DAVIS. (RNA-seq from lenti-shJMJD3 vs microarray from SIRT1-LKO)**

| GO_ID      | Gene Ontology Term               | Gene # | p-Value  |
|------------|----------------------------------|--------|----------|
| GO:0006637 | acyl-CoA metabolic process       | 5      | 3.65E-05 |
| GO:0051186 | cofactor metabolic process       | 8      | 0.001992 |
| GO:0006631 | fatty acid metabolic process     | 8      | 0.002119 |
| GO:0006732 | coenzyme metabolic process       | 7      | 0.002706 |
| GO:0055114 | oxidation reduction              | 15     | 0.005698 |
| GO:0044242 | cellular lipid catabolic process | 4      | 0.017083 |
| GO:0009062 | fatty acid catabolic process     | 3      | 0.020738 |
| GO:0019395 | fatty acid oxidation             | 3      | 0.022481 |
| GO:0034440 | lipid oxidation                  | 3      | 0.022481 |
| GO:0016042 | lipid catabolic process          | 5      | 0.041604 |

**Table S3. Hepatic genes potentially regulated by all of JMJD3, SIRT1 and PPAR $\alpha$  from RNA-seq from lenti-shJMJD3 vs microarray from SIRT1-LKO vs microarray from PPAR $\alpha$ -KO**

| Number | Gene Name       | Number | Gene Name       | Number | Gene Name      | Number | Gene Name       |
|--------|-----------------|--------|-----------------|--------|----------------|--------|-----------------|
| 1      | <i>Ppp1r3c</i>  | 13     | <i>Hmgcs2</i>   | 25     | <i>Aldh3a2</i> | 37     | <i>Sgtb</i>     |
| 2      | <i>Ugt1a9</i>   | 14     | <i>Abcb4</i>    | 26     | <i>Tle1</i>    | 38     | <i>Crat</i>     |
| 3      | <i>Clstn3</i>   | 15     | <i>Pigr</i>     | 27     | <i>Ehhadh</i>  | 39     | <i>Dio3os</i>   |
| 4      | <i>Acot1</i>    | 16     | <i>Cyp4v3</i>   | 28     | <i>Chpt1</i>   | 40     | <i>Tmem98</i>   |
| 5      | <i>Ppm1k</i>    | 17     | <i>Sfxn2</i>    | 29     | <i>Ndr3</i>    | 41     | <i>Slc22a5</i>  |
| 6      | <i>Adck5</i>    | 18     | <i>Btbd11</i>   | 30     | <i>Srd5a1</i>  | 42     | <i>Magix</i>    |
| 7      | <i>Adra1a</i>   | 19     | <i>Ppargc1a</i> | 31     | <i>Lipe</i>    | 43     | <i>Acad11</i>   |
| 8      | <i>Krt23</i>    | 20     | <i>Bc031353</i> | 32     | <i>Kank1</i>   | 44     | <i>Abhd6</i>    |
| 9      | <i>Ube2u</i>    | 21     | <i>Mfsd7c</i>   | 33     | <i>C2cd2l</i>  | 45     | <i>Hsd17b10</i> |
| 10     | <i>Crot</i>     | 22     | <i>Acadm</i>    | 34     | <i>Fbxo21</i>  | 46     | <i>Pex11a</i>   |
| 11     | <i>Ccbl1</i>    | 23     | <i>Mkx</i>      | 35     | <i>Mmd</i>     |        |                 |
| 12     | <i>Cdc42ep5</i> | 24     | <i>Odf3b</i>    | 36     | <i>Tmc7</i>    |        |                 |

**Table S4. Primer sequences used for ChIP-qPCR assays.**

| No. | Gene          | Forward (5'-3')         | Reverse (5'-3')       |
|-----|---------------|-------------------------|-----------------------|
| 1   | <i>Jmjd3</i>  | AGTCTTTCAGGCCACACCAC    | TTTCCCTTGGCATTAGCATC  |
| 2   | <i>Sirt1</i>  | AACTCCTCCACCTGCCTTG     | GAGAGAGCGCAAACCTTCCTG |
| 3   | <i>Fgf21</i>  | TGGCTGTTTCTCCTGTGTTG    | AGGTTCTGCCAAGTGTGTC   |
| 4   | <i>Ppara</i>  | GCCCTTGATTTCTCATCTG     | CCCTGGTATGTCCTTGGATG  |
| 6   | <i>Cpt1</i>   | CTGGCCCGACTTCTCTACAC    | GGACAGAGTGGCTTCTGGAG  |
| 7   | <i>Mcad</i>   | TCAGGAAAGATTGTTGATGTTGA | AGGCACACCAAAGCCTAGAA  |
| 8   | <i>Pepck</i>  | AGGCCTCCCAACATTCATTA    | GCACGGTTTGAACTGACTT   |
| 9   | <i>G6Pase</i> | AAACTGACCCCAGGTCCTCT    | CAGCCAACAGTGTCTCCAAT  |

**Table S5. Primer sequences used for qRT-PCR.**

| No. | Gene           | Forward (5'-3')            | Reverse (5'-3')            |
|-----|----------------|----------------------------|----------------------------|
| 1   | <i>Sirt1</i>   | TTGACTGTGAAGCTGTACGAGGA    | CAAGCGGTTTCATCAGCTGG       |
| 2   | <i>Jmjd3</i>   | TCTGCTGTAACCCACTGCTG       | AGCCAATCATCACCCTTGTC       |
| 3   | <i>Ppara</i>   | CGAGGTGAAAGATTCGGAAA       | GGCCTTGACCTTGTTTCATGT      |
| 4   | <i>Pgc1α</i>   | GCGCCGTGTGATTTACGTT        | AAAACCTCAAAGCGGTCTCTCAA    |
| 5   | <i>Fgf21</i>   | CTGGGGGTCTACCAAGCATA       | CACCCAGGATTTGAATGACC       |
| 6   | <i>Fgfr1</i>   | GATGACCTCACCGCTCTACC       | GGAAGTCGCTCTTCTTGTTG       |
| 7   | <i>Cpt1</i>    | TCGAAACATCTACCATGCAGCA     | CAGCATTCTTCGTGACGTTGG      |
| 8   | <i>Cpt2</i>    | TGACCGACACTTGTGTTGCTC      | CTGGTGGACAGGATGTTGTG       |
| 9   | <i>Mcad</i>    | GATCGCAATGGGTGCTTTTGATAGAA | AGCTGATTGGCAATGTCTCCAGCAAA |
| 10  | <i>CytC</i>    | GGAGGCAAGCATAAGACTGG       | TCCATCAGGGTATCCTCTCC       |
| 11  | <i>Ehhadh</i>  | CAGCACTGGATGTGGATGAC       | CATGACTGTGGCGATGGTAG       |
| 12  | <i>Hmgcs2</i>  | ATACCACCAACGCCTGTTATGG     | CAATGTCACCACAGACCACCAG     |
| 13  | <i>Slc27a2</i> | GGAGTCGTGGAGGTCTGAAG       | GCGATGATGATTGATGGTTG       |
| 15  | <i>Aldh3a2</i> | CTTCCTGAATTGGCTTCTGC       | AGCGGTTGCATGGTAAGAAC       |
| 16  | <i>Acox1</i>   | ACAGCCCAACTGTGACTTCC       | AGGCATGTAACCCGTAGCAC       |
| 17  | <i>Pepck</i>   | CTTCTCTGCCAAGGTCATCC       | TTTTGGGGATGGGCAC           |
| 18  | <i>G6Pase</i>  | GCTGAAACTTTTCAGCCACATCC    | TCCAAGCGGGAAACCAAAC        |
| 19  | <i>Dgat</i>    | GCCAGGCGCTTCTCAA           | TGGTGTGTGGTGATGCTGATC      |
| 20  | <i>Fas</i>     | CCTGGATAGCATTCCGAACCT      | AGCACATCTCGAAGGCTACACA     |
| 21  | <i>CD36</i>    | GCCAAGCTATTGCGACATGA       | AAGGCATTGGCTGGAAGAAC       |
| 22  | <i>Il-1b</i>   | AACCTGCTGGTGTGTGACGTTT     | CAGCACGAGGCTTTTTTGTGTT     |
| 23  | <i>Saa-1</i>   | ATTTGTTACGAGGCTTTCC        | CCCGAGCATGGAAGTATTTG       |
| 24  | <i>Cxcl10</i>  | TTTCTGCCTCATCTGCTG         | CCTATGGCCCTCATTCTCAC       |
| 25  | <i>36B4</i>    | CGACTCACAGAGCAGGC          | CACCGAGGCAACAGTTGG         |
